# Supplementary material
Source: publisher figshare collection journal article supplement (https://springernature.figshare.com/ndownloader/files/18063545)

Supplementary Figure 1: Comparison of the 3-dimensional structure of the Rubisco large subunit of *Spinacia oleracea* (in pink) with modeled 3-dimensional structure of the Rubisco large subunit of *Ilex canariensis* (in orange) using the “magic fit” option of Swiss-Pdb Viewer.

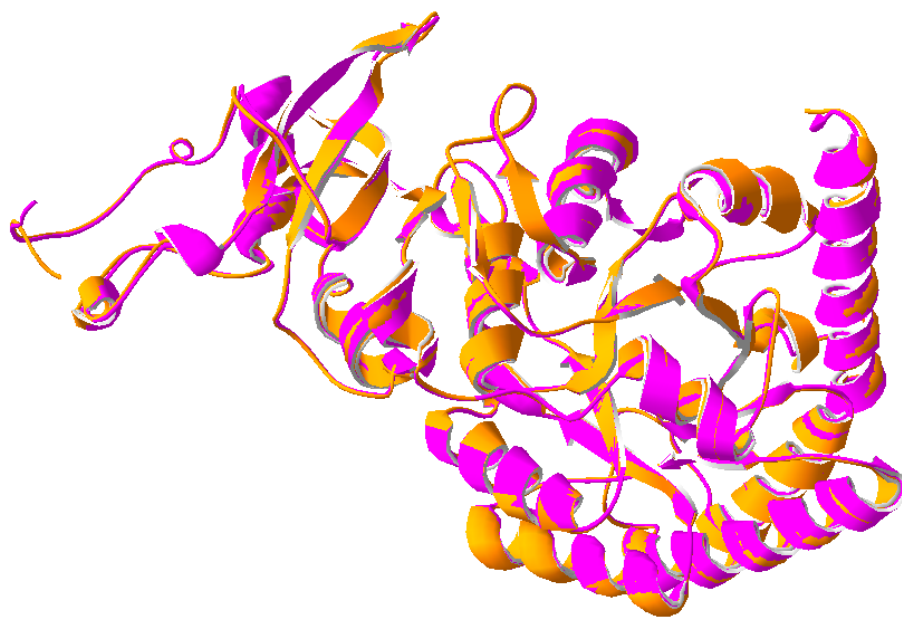

Supplement: Supplementary file [file 18063545]
